# Supplementary material for: Cholesterol-based diazine derivative: selective sensing of Ag+ and Fe3+ ions through gelation and the performance of metallogels in dye and picric acid adsorption from water
Source: Royal Society of Chemistry journal article supplement (doi:10.1039/c8qm00433a), 2018-01-01

## Supporting Information

### Cholesterol-Based Diazine Derivative: Selective Sensing of Ag<sup>+</sup> and Fe<sup>3+</sup> Ions through Gelation and the Performance of Metallogels in Dye and Picric Acid Adsorption from water

Atanu Panja and Kumares Ghosh\*

Department of Chemistry, University of Kalyani, Kalyani-741235, India.  
Email: ghosh\_k2003@yahoo.co.in; kumareschem18@klyuniv.ac.in

Table 1S. Results of gelation test for compound 1.

| Solvent                                                              | 1  |
|----------------------------------------------------------------------|----|
| DMSO                                                                 | PS |
| DMF                                                                  | PS |
| CH <sub>3</sub> CN                                                   | PS |
| THF                                                                  | S  |
| CH <sub>3</sub> OH                                                   | I  |
| Toluene                                                              | G  |
| CHCl <sub>3</sub>                                                    | S  |
| Cyclohexane                                                          | S  |
| DMSO : H <sub>2</sub> O(1:1,v/v)                                     | I  |
| DMF : H <sub>2</sub> O (1:1,v/v)                                     | I  |
| CH <sub>3</sub> CN : H <sub>2</sub> O (1:1,v/v)                      | I  |
| THF: H <sub>2</sub> O (1:1,v/v)                                      | S  |
| CH <sub>3</sub> OH : H <sub>2</sub> O (1:1,v/v)                      | I  |
| CHCl <sub>3</sub> : CH <sub>3</sub> OH (1:1, v/v)                    | P  |
| CHCl <sub>3</sub> : CH <sub>3</sub> OH (1:2, v/v)                    | P  |
| CHCl <sub>3</sub> : CH <sub>3</sub> OH (3:1, v/v)                    | S  |
| Toluene : CH <sub>3</sub> OH (1:1, v/v)                              | S  |
| Ethanol : H <sub>2</sub> O (1:1,v/v)                                 | I  |
| THF : H <sub>2</sub> O(1:1,v/v) + Cu <sup>2+</sup>                   | P  |
| THF : H <sub>2</sub> O(1:1,v/v) + Hg <sup>2+</sup>                   | P  |
| THF : H <sub>2</sub> O(1:1,v/v) + Ag <sup>+</sup>                    | P  |
| CHCl <sub>3</sub> : CH <sub>3</sub> OH (3:1, v/v) + Ag <sup>+</sup>  | G  |
| CHCl <sub>3</sub> : CH <sub>3</sub> OH (3:1, v/v) + Fe <sup>3+</sup> | G  |

S = solution; G = gel; PS = partially soluble; PG = partial gel; I = insoluble; P = Precipitation.

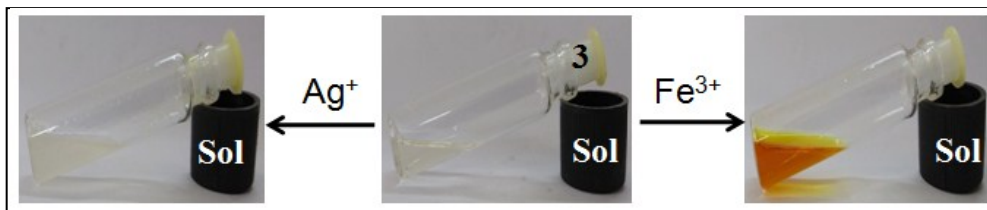

**Fig. 1S.** Pictorial representation of the effect of  $\text{Ag}^+$  and  $\text{Fe}^{3+}$  ions on phase changes of **3** in  $\text{CHCl}_3/\text{CH}_3\text{OH}$  (3:1, v/v). None of the said metal ions caused gelation of **3** under experimental conditions.

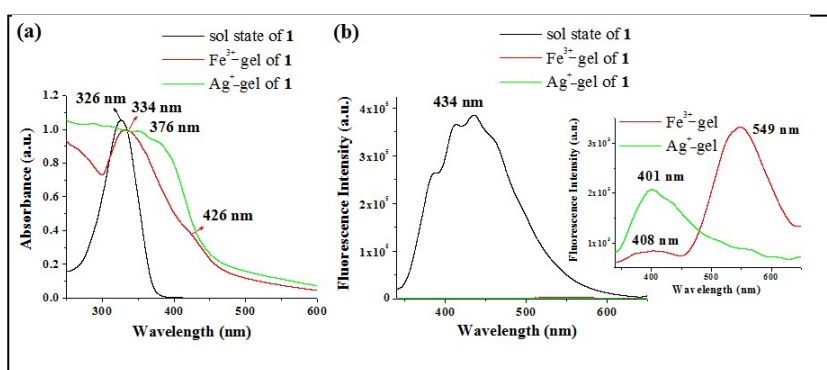

**Fig. 2S.** Comparison of (a) normalized UV-vis and (b) fluorescence spectra ( $\lambda_{\text{ex}} = 330 \text{ nm}$ ) of **1** in the sol and gel states. Inset of (b) signifies the expanded version.

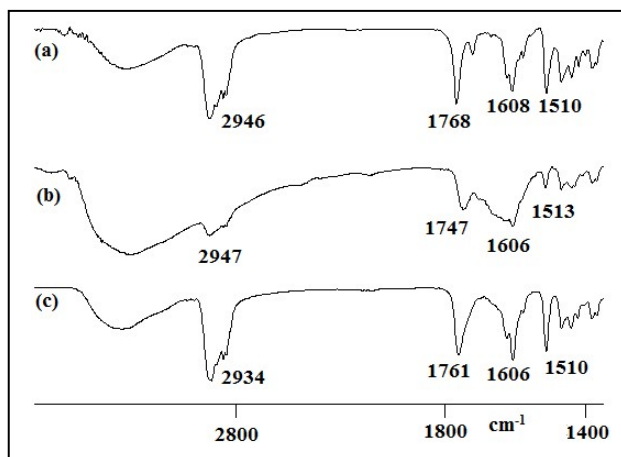

**Fig. 3S.** Partial FTIR spectra of **1** in (a) amorphous state and gel state with (b)  $\text{Fe}^{3+}$  and (c)  $\text{Ag}^+$  ions.

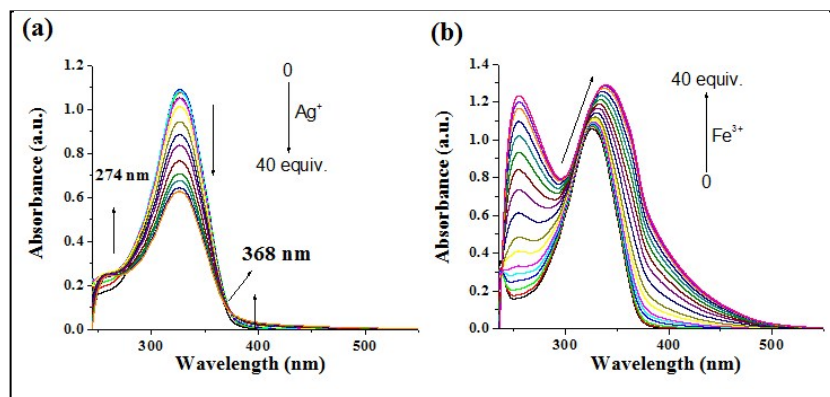

**Fig. 4S.** Change in absorbance of **1** ( $c = 2.50 \times 10^{-5}$  M) upon addition of 40 equiv. amounts (a) Fe<sup>3+</sup> and (b) Ag<sup>+</sup> ions ( $c = 1.0 \times 10^{-3}$  M) in CHCl<sub>3</sub>/CH<sub>3</sub>OH (3:1, v/v).

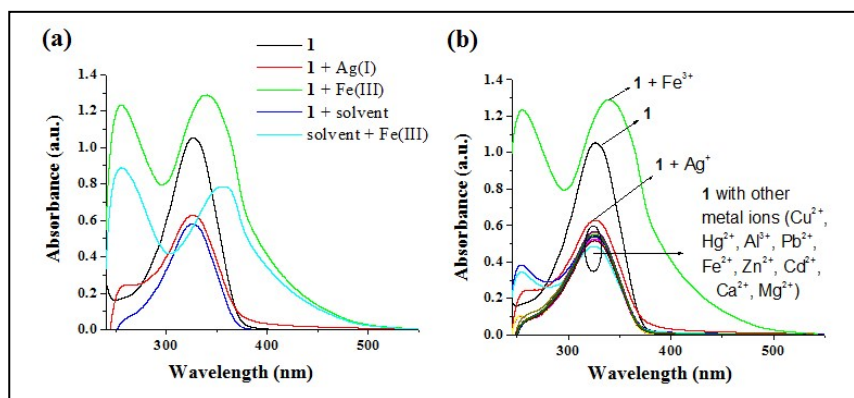

**Fig. 5S.** Comparative plots of absorption changes of **1** ( $c = 2.50 \times 10^{-5}$  M) with (a) solvent and (b) different metal ions (40 equiv.,  $c = 1.0 \times 10^{-3}$  M) in CHCl<sub>3</sub>/CH<sub>3</sub>OH (3:1, v/v).

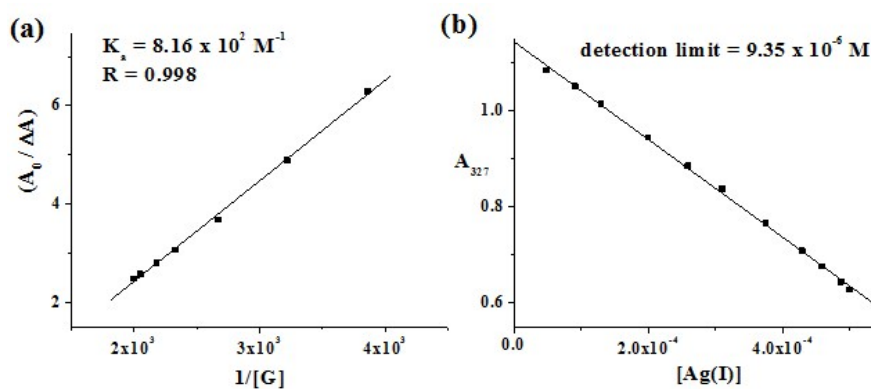

**Fig. 6S.** (a) Benesi-Hilderband plot and (b) detection limit for **1** ( $c = 2.5 \times 10^{-5}$  M) with Ag<sup>+</sup> ion ( $c = 1.0 \times 10^{-3}$  M) at 327 nm in CHCl<sub>3</sub>/CH<sub>3</sub>OH (3:1, v/v) from UV-vis titration.

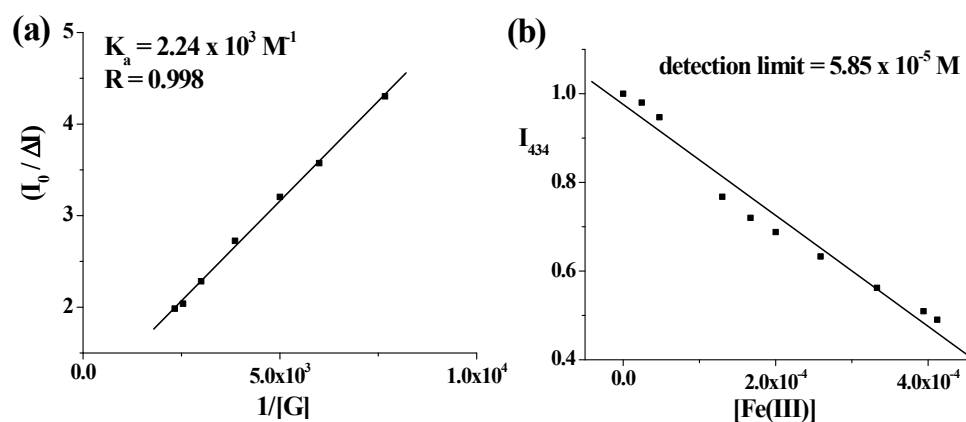

**Fig. 7S.** (a) Benesi–Hilderband plot and (b) detection limit for **1** ( $c = 2.5 \times 10^{-5} \text{ M}$ ) with  $\text{Fe}^{3+}$  ion ( $c = 1.0 \times 10^{-3} \text{ M}$ ) at 434 nm in  $\text{CHCl}_3/\text{CH}_3\text{OH}$  (3:1, v/v) from fluorescence titration.

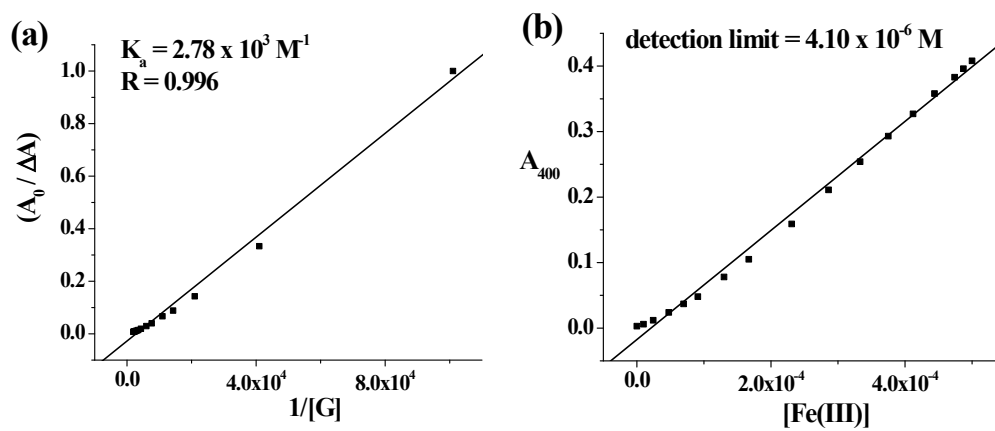

**Fig. 8S.** (a) Benesi–Hilderband plot and (b) detection limit for **1** ( $c = 2.5 \times 10^{-5} \text{ M}$ ) with  $\text{Fe}^{3+}$  ion ( $c = 1.0 \times 10^{-3} \text{ M}$ ) at 400 nm in  $\text{CHCl}_3/\text{CH}_3\text{OH}$  (3:1, v/v) from UV-vis titration.

**Table 2S.** Binding constant and detection limit values of the metal-**1** complexes.

| Metal-ligand complex        | Binding constant values ( M <sup>-1</sup> ) |                             |
|-----------------------------|---------------------------------------------|-----------------------------|
|                             | From UV-vis titration                       | From fluorescence titration |
| <b>1</b> – Ag <sup>+</sup>  | K = 8.16 × 10 <sup>2</sup>                  | -                           |
| <b>1</b> – Fe <sup>3+</sup> | K = 2.78 × 10 <sup>3</sup>                  | K = 2.24 × 10 <sup>3</sup>  |

  

| Metal-ligand complex        | Detection limit values ( M) |                             |
|-----------------------------|-----------------------------|-----------------------------|
|                             | From UV-vis titration       | From fluorescence titration |
| <b>1</b> – Ag <sup>+</sup>  | 9.35 × 10 <sup>-6</sup>     | -                           |
| <b>1</b> – Fe <sup>3+</sup> | 4.10 × 10 <sup>-6</sup>     | 5.85 × 10 <sup>-5</sup>     |

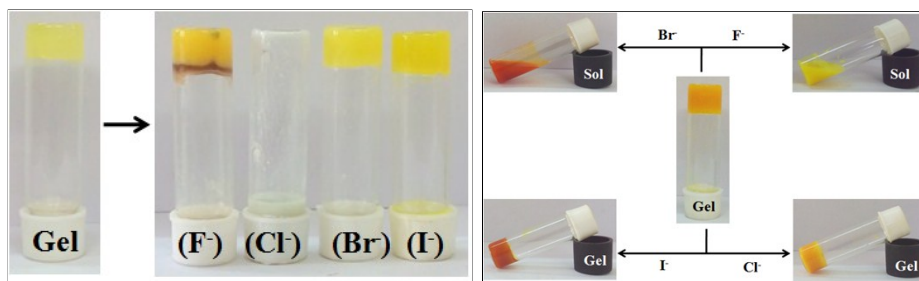

**Fig. 9S.** Photograph showing the chemical responsiveness of the Ag<sup>+</sup>-induced (left) and Fe<sup>3+</sup>-induced (right) gel of **1** toward different halides.

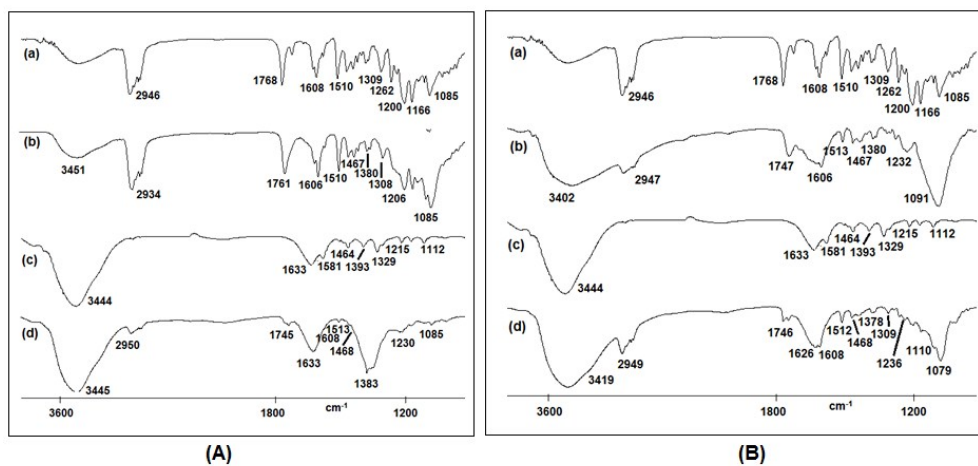

**Fig. 10S.** (A) Partial FTIR spectra of (a) **1**, (b) **1**-Fe<sup>3+</sup> gel, (c) Uranine and (d) Uranine adsorbed **1**-Fe<sup>3+</sup> gel. (B) Partial FTIR spectra of (a) **1**, (b) **1**-Ag<sup>+</sup> gel, (c) Uranine and (d) Uranine adsorbed **1**-Ag<sup>+</sup> gel.

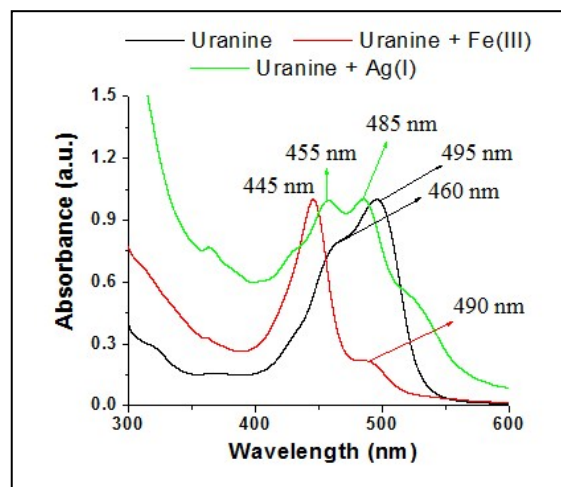

**Fig. 11S.** Comparison of normalized UV-vis spectra of Uranine in absence and presence of  $\text{Fe}^{3+}$  and  $\text{Ag}^+$  ions in  $\text{CHCl}_3/\text{CH}_3\text{OH}$  (3:1, v/v) containing 1%  $\text{H}_2\text{O}$ .

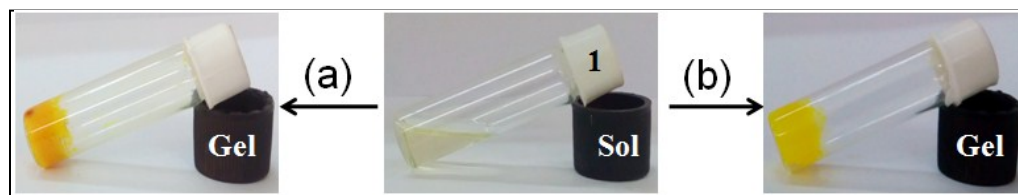

**Fig. 12S.** Photograph representing the gel formation of **1** in  $\text{CHCl}_3/\text{CH}_3\text{OH}$  (3:1, v/v) upon simultaneous addition of (a)  $\text{Fe}^{3+}$  and PA and (b)  $\text{Ag}^+$  and PA.

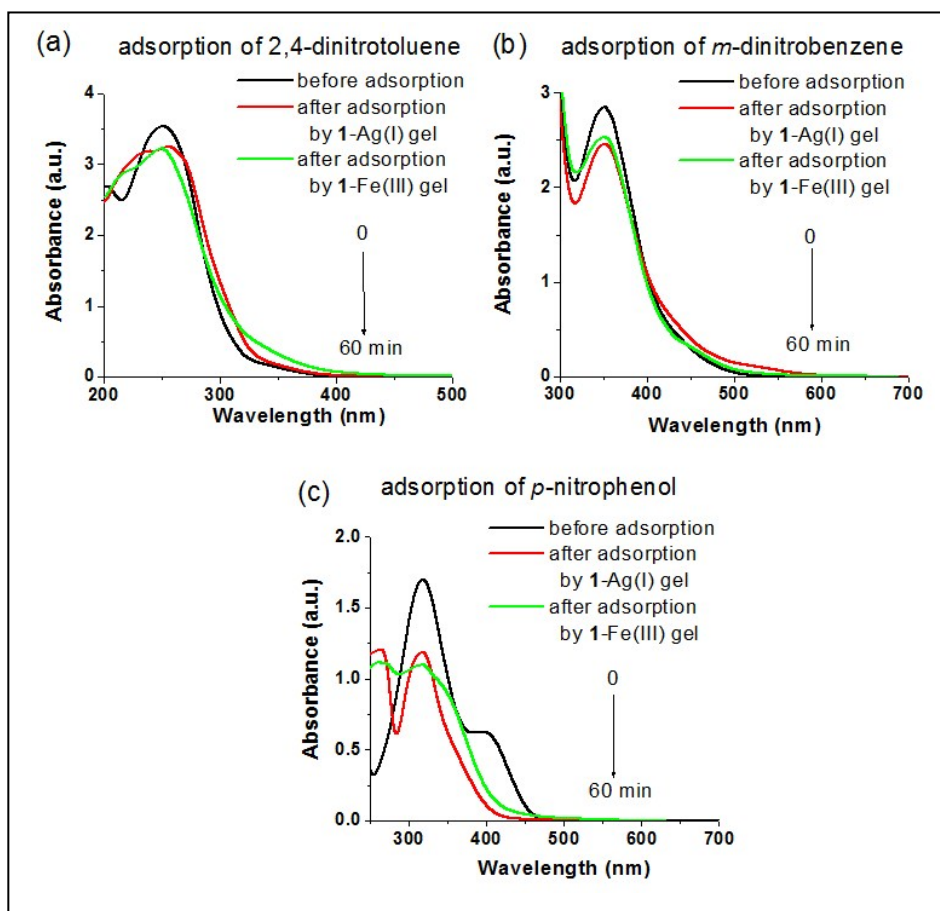

**Fig. 13S.** Change in absorbance of (a) 2,4-dinitrotoluene, (b) *m*-dinitrobenzene and (c) *p*-nitrophenol during adsorption by 1-Fe<sup>3+</sup> and (b) 1-Ag<sup>+</sup> gels [For *m*-dinitrobenzene,  $c = 1 \times 10^{-4}$  M; for other cases,  $c = 2 \times 10^{-4}$  M; for all the compounds, 3 mL of aqueous solution containing 0.01% CH<sub>3</sub>CN was used for the experiment. The gels were initially prepared by adding equiv. amount of respective metal salts to **1** (25 mg/mL) in CHCl<sub>3</sub>/CH<sub>3</sub>OH (3:1, v/v)].

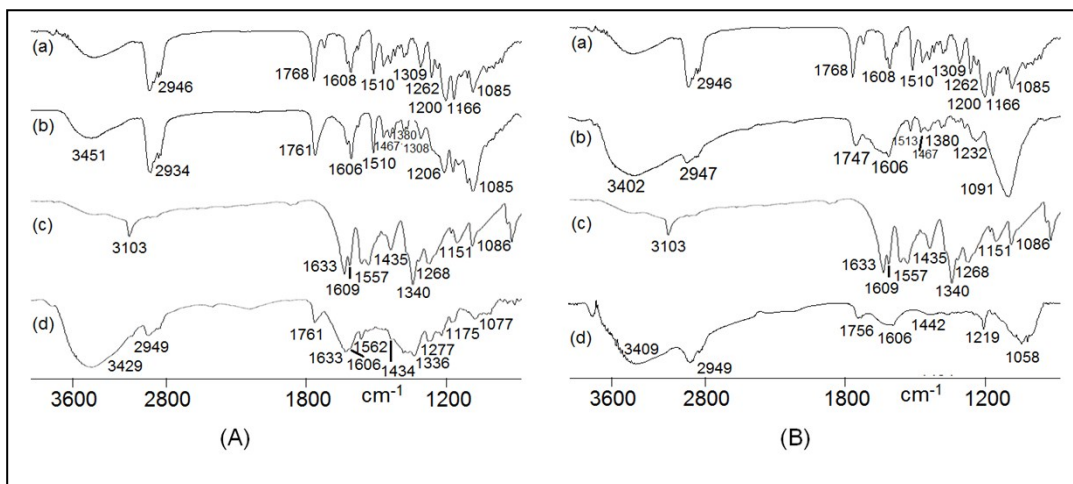

**Fig. 10S.** (A) Partial FTIR spectra of (a) **1**, (b) **1-Ag<sup>+</sup> gel**, (c) **PA** and (d) **PA adsorbed 1-Ag<sup>+</sup> gel**. (B) Partial FTIR spectra of (a) **1**, (b) **1-Fe<sup>3+</sup> gel**, (c) **PA** and (d) **PA adsorbed 1-Fe<sup>3+</sup> gel**.

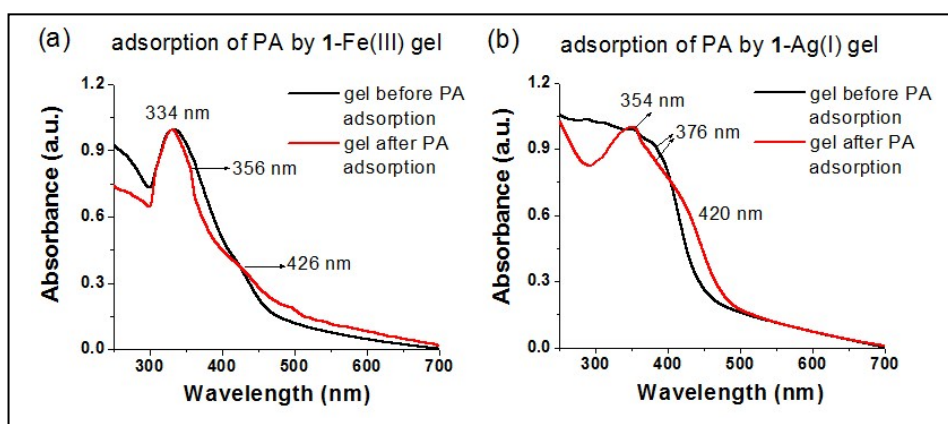

**Fig. 15S.** Comparison of normalized UV-vis spectra of (a) **1-Fe<sup>3+</sup> gel** and (b) **1-Ag<sup>+</sup> gel**, before and after adsorption of PA.

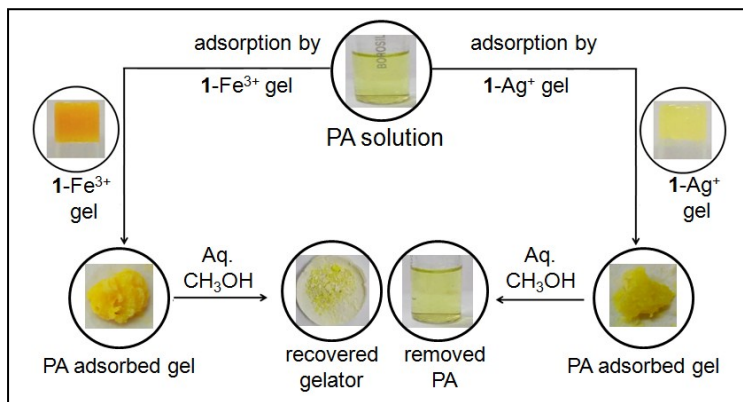

**Fig. 16S.** Photograph showing the recyclability of the PA adsorption process.



**Table 3S.** Reported structures for Fe<sup>3+</sup> sensing in solution and gel phase

| Entry     | Gelator structure                                                                   | Gelation        | Sensing mechanism                              | solvent                                                    | Interference from other metal ions                                             | Ref . |
|-----------|-------------------------------------------------------------------------------------|-----------------|------------------------------------------------|------------------------------------------------------------|--------------------------------------------------------------------------------|-------|
| 1         | 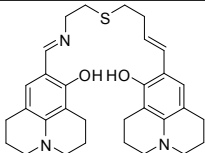   | No gelation     | Colorimetric sensing                           | MeOH–buffer solution (9 : 1, v/v, 10 mM, bis-tris, pH 7.0) | Fe <sup>2+</sup>                                                               | 1c    |
| 2         |    | No gelation     | Colorimetric sensing                           | MeOH<br>aqueous HEPES buffer at pH 7.2                     | Fe <sup>2+</sup> , Cu <sup>2+</sup><br><br>Fe <sup>2+</sup> , Cu <sup>2+</sup> | 1d    |
| 3         |    | No gelation     | Fluorescence OFF                               | THF                                                        | Fe <sup>2+</sup>                                                               | 1e    |
| 4         |   | <b>Gelation</b> | Sol to gel transition                          | Water                                                      | Fe <sup>2+</sup>                                                               | 1a    |
| 5         |  | No gelation     | Fluorescence ON                                | THF                                                        | Fe <sup>2+</sup>                                                               | 1f    |
| 6         |  | <b>Gelation</b> | Fluorescence OFF<br>Gel-to-Gel state           | H <sub>2</sub> O                                           | -                                                                              | 1b    |
| 7         |  | <b>Gelation</b> | Visual detection through gel-to-sol transition | CH <sub>3</sub> CN/ H <sub>2</sub> O (1:1)                 | Cu <sup>2+</sup>                                                               | 1g    |
| 8         |  | <b>Gelation</b> | Visual detection through gel-to-sol transition | CH <sub>3</sub> CN/ H <sub>2</sub> O (1:1)                 | -                                                                              | 1g    |
| 9         |  | <b>Gelation</b> | Visual detection through color change          | DMSO/ H <sub>2</sub> O (1:1)                               | -                                                                              | 1g    |
| This work |  | <b>Gelation</b> | Visual detection through sol-to-gel transition | CHCl <sub>3</sub> /CH <sub>3</sub> OH (3:1, v/v)           | Ag <sup>+</sup><br><br>(No interference from Fe <sup>2+</sup> )                | -     |

**Table 4S.** Adsorption of Picric acid (PA) by different adsorbents

| Entry     | Adsorbent                                                                                                                | Removal efficiency for PA (%)                                                                   | Ref. |
|-----------|--------------------------------------------------------------------------------------------------------------------------|-------------------------------------------------------------------------------------------------|------|
| 1         | 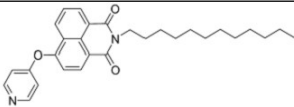<br>Low molecular weight gelator (LMWG) | <b>56.86</b><br>(from absorption spectroscopic study)                                           | 2a   |
| 2         | carbon nanotubes                                                                                                         | 83.2                                                                                            | 2b   |
| 3         | active carbon                                                                                                            | >99                                                                                             | 2c   |
| 4         | Amberlite IRA-67                                                                                                         | 96                                                                                              | 2d   |
| 5         | Mesoporous MCM-41                                                                                                        | >82                                                                                             | 2e   |
| 6         | iron oxide nanoparticles                                                                                                 | 99                                                                                              | 2f   |
| This work | <br>Low molecular weight gelator (LMWG) | <b>83%</b> (by <b>1</b> -Fe <sup>3+</sup> gel)<br><b>74%</b> (by <b>1</b> -Ag <sup>+</sup> gel) | -    |

1. (a) J. -L. Zhong, X. -J. Jia, H. -J. Liu, X. -Z. Luo, S. -G. Hong, N. Zhanga and J. -B. Huang, *SoftMatter*, 2016, **12**, 191; (b) J. -F. Chen, Q. Lin, H. Yao, Y. -M. Zhang and T. -B. Wei, *Mater. Chem. Front.*, 2018, **2**, 999; (c) Y. S. Kim, G. J. Park, J. J. Lee, S. Y. Lee, S. Y. Lee and C. Kim, *RSC Adv.*, 2015, **5**, 11229; (d) A. Mitra, B. Ramanujam and C. P. Rao, *Tetrahedron Lett.*, 2009, **50**, 776; (e) P. Kumar, V. Kumar and R. Gupta, *RSC Adv.*, 2015, **5**, 97874; (f) S. Sen, S. Sarkar, B. Chattopadhyay, A. Moirangthem, A. Basu, K. Dhara and P. Chattopadhyay, *Analyst*, 2012, **137**, 3335; (g) A. Panja and K. Ghosh, *Mater. Chem. Front.*, 2018, DOI: 10.1039/c8qm00257f.

2. (a) X. Cao, N. Zhao, H. Lv, Q. Ding, A. Gao, Q. Jing and T. Yi, *Langmuir*, 2017, **33**, 7788; (b) S. Gholitabar and H. Tahermansouri, *Carbon Lett.*, 2017, **22**, 14; (c) R. Qadeer and A. H. Rehan, *Turk. J. Chem.*, 2002, **26**, 557; (d) H. Uslu, and G. Demir, *J. Chem. Eng. Data*, 2010, **55**, 3290; (e) H. Sepehrian, J. Fasihi and M. K. Mahani, *Ind. Eng. Chem. Res.*, 2009, **48**, 6772; (f) H. Parham, B. Zargar and M. Rezazadeh, *Mater. Sci. Eng. C.*, 2012, **32**, 2109.

$^1\text{H NMR}$  ( $\text{CDCl}_3$ , 400 MHz)

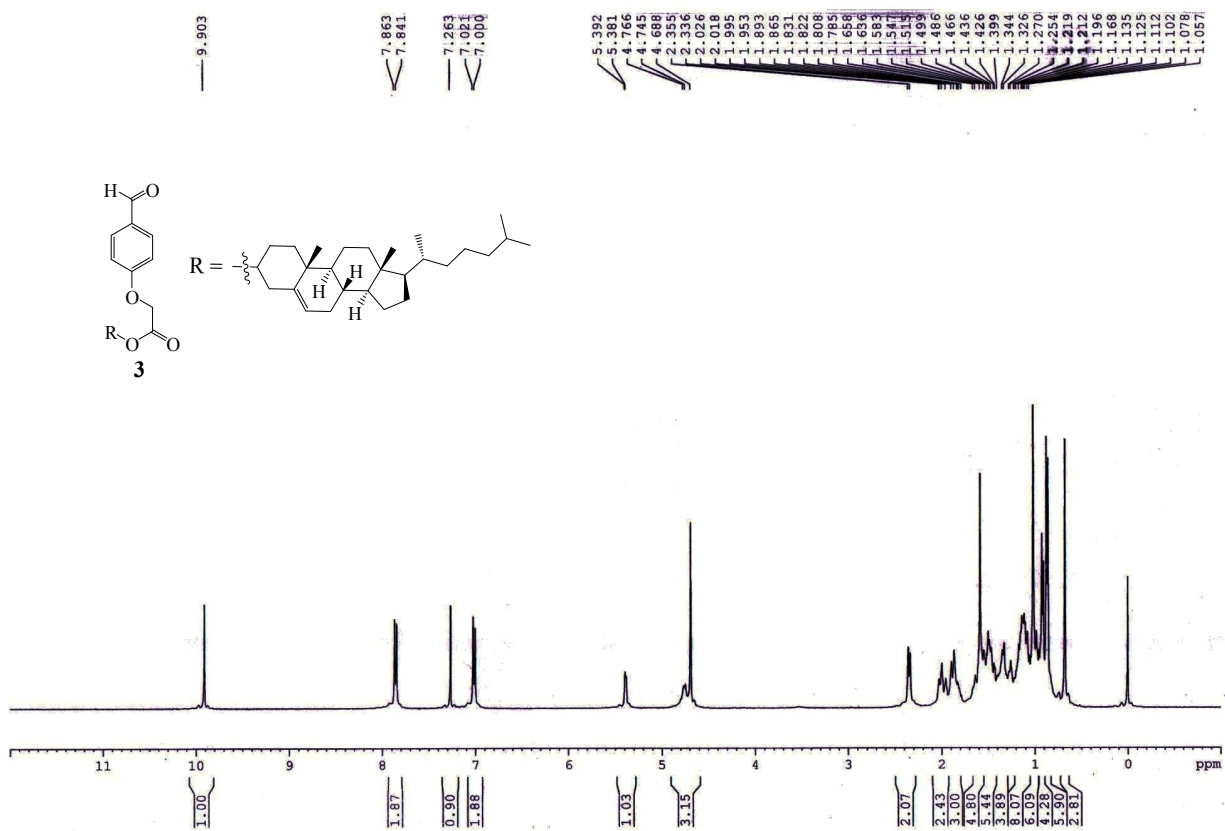

**$^{13}\text{C}$  NMR (CDCl<sub>3</sub>, 100 MHz)**

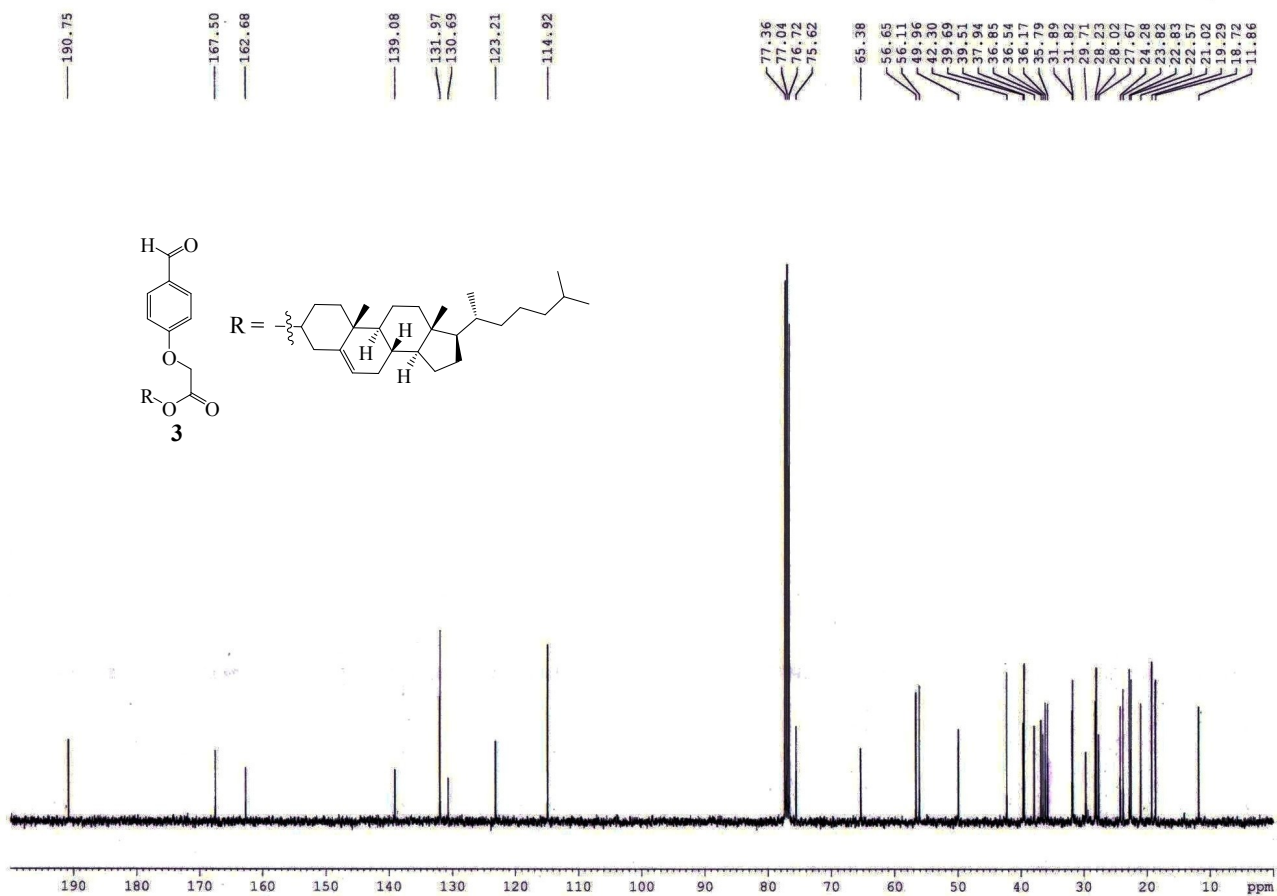

# Mass spectrum of 3.

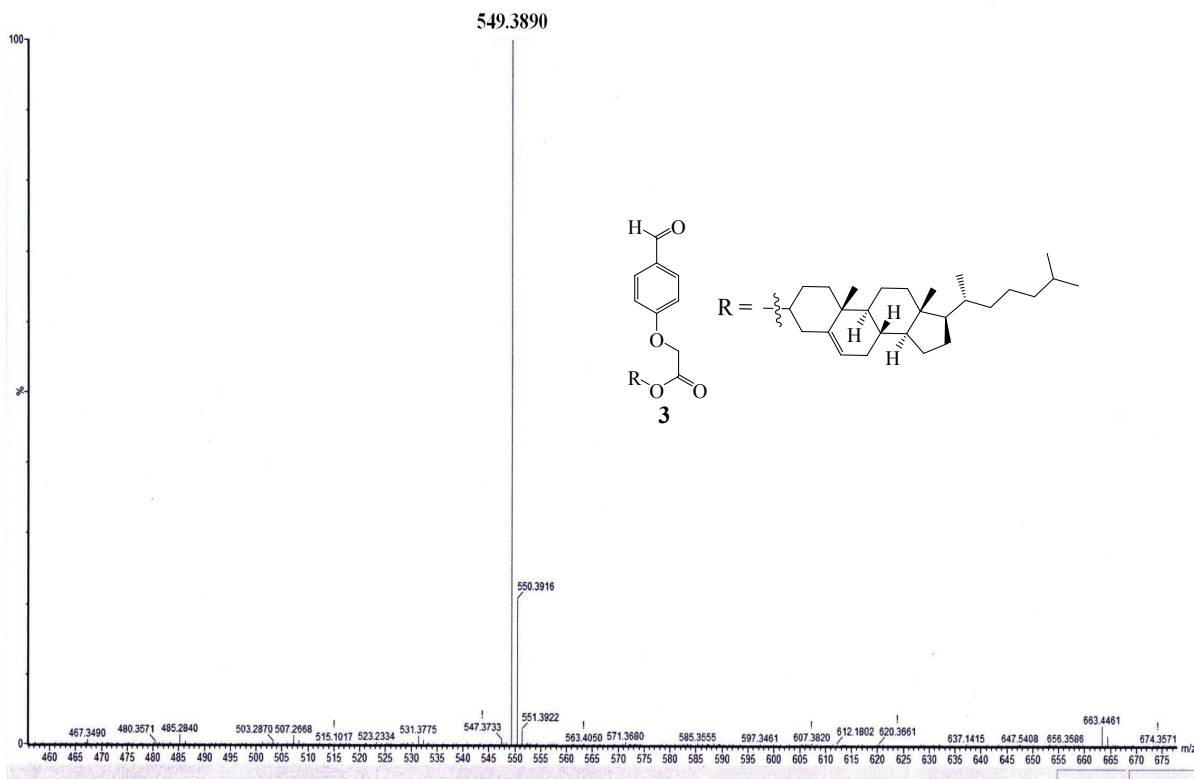

<sup>1</sup>H NMR (CDCl<sub>3</sub>, 400 MHz)

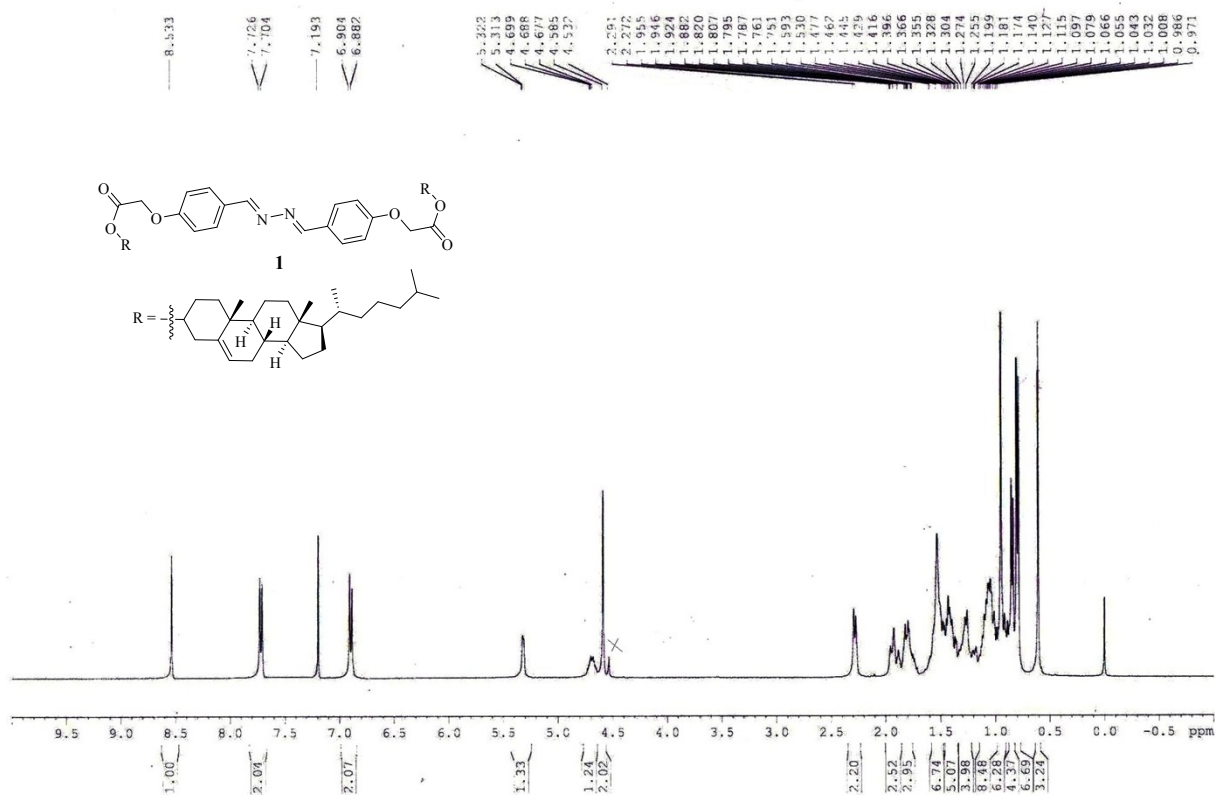

**$^{13}\text{C}$  NMR (CDCl<sub>3</sub>, 100 MHz)**

167.93  
161.07  
160.16  
139.16  
130.17  
127.87  
123.12  
114.90

77.37  
77.05  
76.74  
75.42  
65.45  
56.65  
56.11  
49.76  
48.60  
39.51  
37.95  
36.87  
36.55  
36.18  
35.80  
31.89  
31.82  
28.24  
27.02  
24.28  
23.84  
22.85  
22.58  
21.02  
19.30  
18.72  
11.87

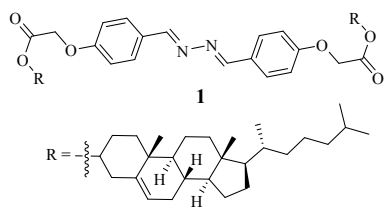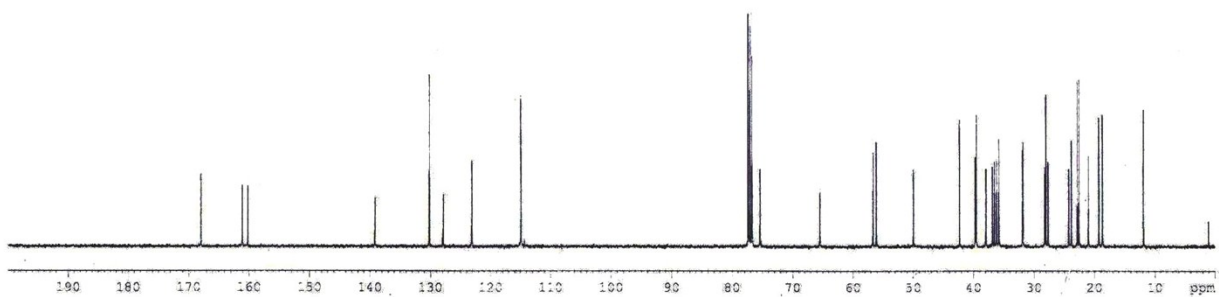

# Mass spectrum of 1.

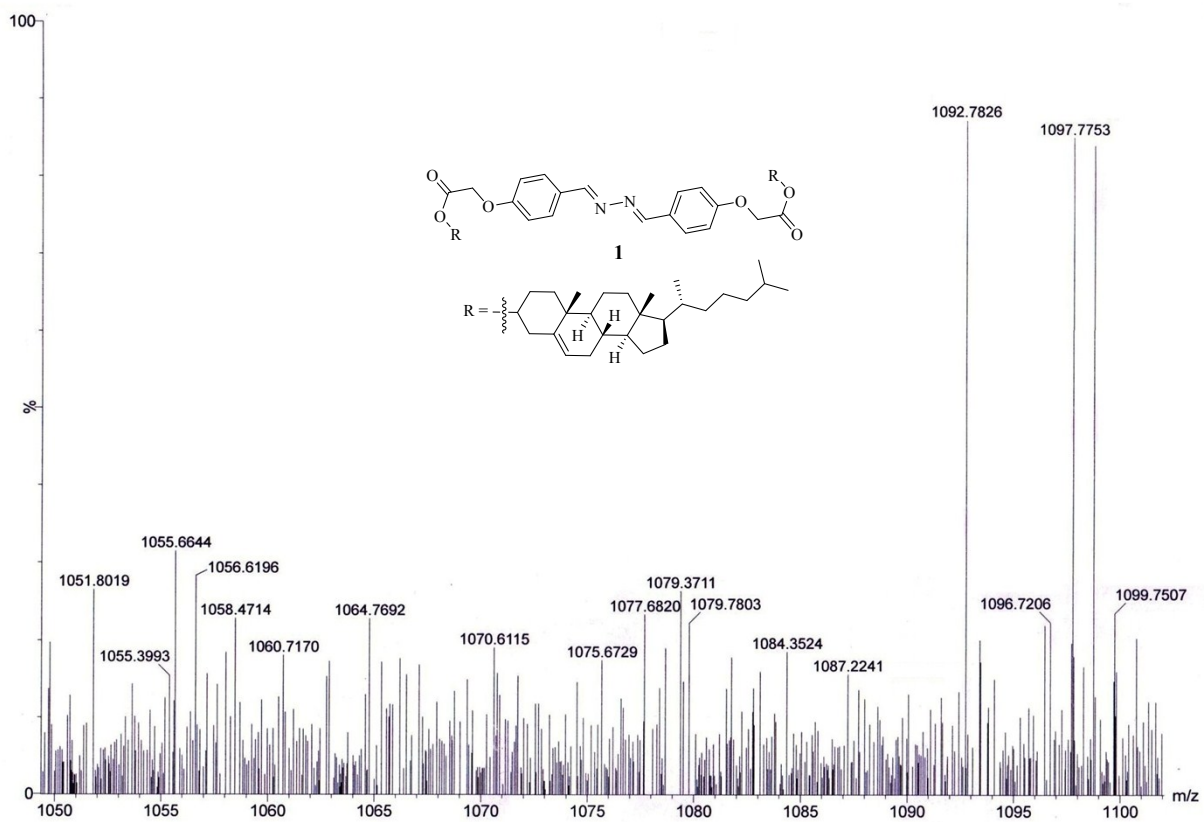

Supplement: c8qm00433a1.pdf [file c8qm00433a1.pdf]
